# Supplementary material for: The autophagy protein ATG9A enables lipid mobilization from lipid droplets
Source: PubMed Central journal article supplement (PMC8605025; doi:10.1038/s41467-021-26999-x), 2021-11-19
Supplement: 41467_2021_26999_MOESM3_ESM.pdf [file 41467_2021_26999_MOESM3_ESM.pdf]

## **Description of Additional Supplementary Files**

File name: Supplementary Data 1

Description: Raw data of the TAP-MS analysis of proteins that co-purify with ATG9A-FTS in HeLa cells.
